# Supplementary material
Source: HighWire-hosted journal article supplement (https://qualitysafety.bmj.com/highwire/filestream/160386/field_highwire_adjunct_files/3/bmjqs-2020-012729supp004_data_supplement.pdf)
Supplement: bmjqs-2020-012729supp004_data_supplement.pdf [file bmjqs-2020-012729supp004_data_supplement.pdf]

**Appendix D: GRIPP2 Reporting Checklist – Short Form (Staniszewska et al., 2017)**

| Section and topic                     | Item                                                                                                                 | Section where reported and details                                                                                                                                                                                                                                                                                            |
|---------------------------------------|----------------------------------------------------------------------------------------------------------------------|-------------------------------------------------------------------------------------------------------------------------------------------------------------------------------------------------------------------------------------------------------------------------------------------------------------------------------|
| 1: Aim                                | Report the aim of PPI (patient and public involvement) in the study                                                  | Study aim is included in the Methods: <i>In line with the policy, ethical and political imperatives included in the introduction, patient engagement in this research was considered essential, in order to ensure that patient perspectives were integral to preparation, execution and translation.</i>                     |
| 2: Methods                            | Provide a clear description of the methods used for PPI in the study                                                 | Patients are co-authors and so all methods relate to their contribution as stated. Additional information is included in the Methods. The influence of the Harrison et al. (2019) foundational principles and best practice activities for patient stakeholder engagement in research is also included.                       |
| 3: Study results                      | Outcomes—Report the results of PPI in the study, including both positive and negative outcomes                       | The research team reflected on and discussed the outcomes, benefits and challenges of the patient engagement and these are reported in Table 3.                                                                                                                                                                               |
| 4: Discussion and conclusions         | Outcomes—Comment on the extent to which PPI influenced the study overall. Describe positive and negative effects     | Table 3 includes this information in detail. Specific instances of patient influence are also included in the paper Methods and Discussion such as. including searching of the <i>Patient Experience Journal</i> and emphasising the importance of implementing organisational procedures for reimbursement and compensation. |
| 5: Reflections / critical perspective | Comment critically on the study, reflecting on the things that went well and those that did not, so others can learn | Table 3 includes a critical analysis. Further information is included in the discussion section including Limitations.                                                                                                                                                                                                        |
